# Supplementary material for: Prognostic prediction models for pregnancy complications in women with gestational diabetes: a protocol for systematic review, critical appraisal and meta-analysis
Source: PubMed Central journal article supplement (PMC6844063; doi:10.1186/s13643-019-1151-0), 2019-11-11
Supplement: 13643_2019_1151_MOESM1_ESM.pdf [file 13643_2019_1151_MOESM1_ESM.pdf]

## Additional file 1

Table S1. Draft search strategy for MEDLINE.

| Concept                                                                                                                | Step | Search Strategy                                                                                                                                                                                                                                                                                                                                                                                                                                                                         |
|------------------------------------------------------------------------------------------------------------------------|------|-----------------------------------------------------------------------------------------------------------------------------------------------------------------------------------------------------------------------------------------------------------------------------------------------------------------------------------------------------------------------------------------------------------------------------------------------------------------------------------------|
| <b>Study type = prediction modelling studies</b>                                                                       |      |                                                                                                                                                                                                                                                                                                                                                                                                                                                                                         |
| Study type = prediction modelling studies<br>(Ingui filter for prediction models(1))                                   | 1    | Validat\$.mp. or Predict\$.ti. or Rule\$.mp.                                                                                                                                                                                                                                                                                                                                                                                                                                            |
|                                                                                                                        | 2    | (Predict\$ and (Outcome\$ or Risk\$ or Model\$)).mp.                                                                                                                                                                                                                                                                                                                                                                                                                                    |
|                                                                                                                        | 3    | ((History or Variable\$ or Criteria or Scor\$ or Characteristic\$ or Finding\$ or Factor\$) and (Predict\$ or Model\$ or Decision\$ or Identif\$ or Prognos\$)).mp.                                                                                                                                                                                                                                                                                                                     |
|                                                                                                                        | 4    | Decision\$.mp. and ((Model\$ or Clinical\$).mp. or Logistic Models/)                                                                                                                                                                                                                                                                                                                                                                                                                    |
|                                                                                                                        | 5    | (Prognostic and (History or Variable\$ or Criteria or Scor\$ or Characteristic\$ or Finding\$ or Factor\$ or Model\$)).mp.                                                                                                                                                                                                                                                                                                                                                              |
|                                                                                                                        | 6    | or/1-5                                                                                                                                                                                                                                                                                                                                                                                                                                                                                  |
| Study type = prediction modelling studies<br>(Addition to Ingui filter proposed by Geersing to improve sensitivity(2)) | 7    | Stratification.mp. or "ROC Curve"/ or Discrimination.mp. or Discriminate.mp. or c-statistic.mp. or "c statistic".mp. or "Area under the curve".mp. or AUC.mp. or Calibration.mp. or Indices.mp. or Algorithm.mp. or Multivariable.mp.<br>[mp=title, abstract, original title, name of substance word, subject heading word, floating sub-heading word, keyword heading word, protocol supplementary concept word, rare disease supplementary concept word, unique identifier, synonyms] |
| Combination of study type concepts                                                                                     | 8    | 6 or 7                                                                                                                                                                                                                                                                                                                                                                                                                                                                                  |
| <b>Population = women with gestational diabetes</b>                                                                    |      |                                                                                                                                                                                                                                                                                                                                                                                                                                                                                         |
|                                                                                                                        | 9    | exp diabetes, gestational/                                                                                                                                                                                                                                                                                                                                                                                                                                                              |
|                                                                                                                        | 10   | (gestation* adj4 diabet*).ti,ab.                                                                                                                                                                                                                                                                                                                                                                                                                                                        |
|                                                                                                                        | 11   | gdm.ti,ab.                                                                                                                                                                                                                                                                                                                                                                                                                                                                              |
|                                                                                                                        | 12   | (glucose adj4 (pregnan* or gestation* or prenatal* or antenatal* or pre-natal* or ante-natal* or maternal*)).ti,ab.                                                                                                                                                                                                                                                                                                                                                                     |
|                                                                                                                        | 13   | or/9-12                                                                                                                                                                                                                                                                                                                                                                                                                                                                                 |
| <b>Outcomes = pregnancy complications</b>                                                                              |      |                                                                                                                                                                                                                                                                                                                                                                                                                                                                                         |
| Hypertensive disorders of pregnancy                                                                                    | 14   | exp Hypertension, Pregnancy-Induced/                                                                                                                                                                                                                                                                                                                                                                                                                                                    |
|                                                                                                                        | 15   | ((hypertens* adj3 pregnan*) or gestational hypertens* or pre-eclamp* or preeclamp* or eclamp* or HELLP syndrome).ti,ab.                                                                                                                                                                                                                                                                                                                                                                 |
|                                                                                                                        | 16   | 14 or 15                                                                                                                                                                                                                                                                                                                                                                                                                                                                                |
| Perinatal mortality                                                                                                    | 17   | exp Perinatal Mortality/ or Fetal Mortality/ or Perinatal Death/ or exp Fetal Death/                                                                                                                                                                                                                                                                                                                                                                                                    |
|                                                                                                                        | 18   | ((perinatal or neonatal or f?etal or intrauterine or intra-uterine) adj (mortalit* or death* or demise or loss)) or stillbirth*).ti,ab.                                                                                                                                                                                                                                                                                                                                                 |
|                                                                                                                        | 19   | 17 or 18                                                                                                                                                                                                                                                                                                                                                                                                                                                                                |
| Large-for-gestational age (LGA)                                                                                        | 20   | exp Birth Weight/                                                                                                                                                                                                                                                                                                                                                                                                                                                                       |
|                                                                                                                        | 21   | ((Large* adj3 gestation*) or LGA or large birth*).ti,ab.                                                                                                                                                                                                                                                                                                                                                                                                                                |

|                           |    |                                                                                                                                                                                                                                                                                                                                                    |
|---------------------------|----|----------------------------------------------------------------------------------------------------------------------------------------------------------------------------------------------------------------------------------------------------------------------------------------------------------------------------------------------------|
|                           | 22 | 20 or 21                                                                                                                                                                                                                                                                                                                                           |
| Perinatal morbidity       |    | exp Birth Injuries/ or exp \$Dystocia/ or exp Brachial Plexus Neuropathies/ or exp Obstetric Labor Complications/                                                                                                                                                                                                                                  |
|                           | 23 |                                                                                                                                                                                                                                                                                                                                                    |
|                           | 24 | (birth injur* or ((birth or labo?r or obstetric* or perinatal or delivery) adj4 (trauma* or injur* or complication*1)) or (shoulder adj4 dystocia*) or (fracture*1 adj4 (clavic* or humerus or shoulder*1 or arm*1)) or ((neonat* or infant* or erb* or obstetric or brachial) adj5 (palsy or neuropath*)) or nerve palsy or plexus injury).ti,ab. |
|                           | 25 | 23 or 24                                                                                                                                                                                                                                                                                                                                           |
| Caesarean delivery        | 26 | exp Cesarean Section/                                                                                                                                                                                                                                                                                                                              |
|                           | 27 | (c?esar* or (delivery adj abdominal) or c-section).ti,ab.                                                                                                                                                                                                                                                                                          |
|                           | 28 | 26 or 27                                                                                                                                                                                                                                                                                                                                           |
| Maternal mortality        | 29 | Maternal Mortality/ or Maternal Death/                                                                                                                                                                                                                                                                                                             |
|                           | 30 | ((maternal or mother* or woman or women or pregnan* or gestation*) adj2 (mortalit* or death* or dies or died)).ti,ab.                                                                                                                                                                                                                              |
|                           | 31 | 29 or 30                                                                                                                                                                                                                                                                                                                                           |
| Induction of labour       | 32 | exp Labor, Induced/                                                                                                                                                                                                                                                                                                                                |
|                           | 33 | (induc* adj3 (labo?r or deliver*)).ti,ab.                                                                                                                                                                                                                                                                                                          |
|                           | 34 | 32 or 33                                                                                                                                                                                                                                                                                                                                           |
| Placental abruption       | 35 | Abruptio Placentae/                                                                                                                                                                                                                                                                                                                                |
|                           | 36 | (placenta* adj2 abrupt*).ti,ab.                                                                                                                                                                                                                                                                                                                    |
|                           | 37 | 35 or 36                                                                                                                                                                                                                                                                                                                                           |
| Perineal trauma           | 38 | Episiotomy/                                                                                                                                                                                                                                                                                                                                        |
|                           | 39 | ((perine* adj2 (trauma or injur* or tear*)) or ((birth or sphincter*) adj (injury or trauma)) or (third-degree adj tear*) or (fourth-degree adj tear*) or episiotom*).ti,ab.                                                                                                                                                                       |
|                           | 40 | 38 or 39                                                                                                                                                                                                                                                                                                                                           |
| Postpartum haemorrhage    | 41 | Postpartum Hemorrhage/                                                                                                                                                                                                                                                                                                                             |
|                           | 42 | ((postpartum or post-partum) adj1 h?emorrhage).ti,ab.                                                                                                                                                                                                                                                                                              |
|                           | 43 | 41 or 42                                                                                                                                                                                                                                                                                                                                           |
| Neonatal hypoglycaemia    | 44 | hypoglycemia/ and (infan* or neonat* or newborn* or baby or babies).ti,ab.                                                                                                                                                                                                                                                                         |
|                           | 45 | ((((infan* or neonat* or newborn* or baby or babies) and hypoglyc?em*) or (((infan* or neonat* or newborn* or baby or babies) and low) adj2 (glucose or sugar))).ti,ab.                                                                                                                                                                            |
|                           | 46 | 44 or 45                                                                                                                                                                                                                                                                                                                                           |
| Fetal macrosomia          | 47 | exp Fetal Macrosomia/                                                                                                                                                                                                                                                                                                                              |
|                           | 48 | macrosomi*.ti,ab.                                                                                                                                                                                                                                                                                                                                  |
|                           | 49 | 47 or 48                                                                                                                                                                                                                                                                                                                                           |
| Small-for-gestational age | 50 | Infant, Small for Gestational Age/                                                                                                                                                                                                                                                                                                                 |
|                           | 51 | ((small* adj3 gestation*) or SGA).ti,ab.                                                                                                                                                                                                                                                                                                           |
|                           | 52 | 50 or 51                                                                                                                                                                                                                                                                                                                                           |
| Low birth weight          | 53 | exp Infant, Low Birth Weight/                                                                                                                                                                                                                                                                                                                      |
|                           | 54 | (low-birth-weight or low birthweight*).ti,ab.                                                                                                                                                                                                                                                                                                      |
|                           | 55 | 53 or 54                                                                                                                                                                                                                                                                                                                                           |
|                           | 56 | exp Fetal Growth Retardation/                                                                                                                                                                                                                                                                                                                      |

|                                           |    |                                                                                                                                                                                                                   |
|-------------------------------------------|----|-------------------------------------------------------------------------------------------------------------------------------------------------------------------------------------------------------------------|
| Intrauterine growth restriction (IUGR)    | 57 | (fetal growth restrict* or fetal growth retard* or intra-uterine growth retard* or intra-uterine growth restrict* or intrauterine growth retard* or intrauterine growth restrict* or IUGR).ti,ab.                 |
|                                           | 58 | 56 or 57                                                                                                                                                                                                          |
| Preterm delivery or premature birth       | 59 | exp Obstetric Labor, Premature/ or exp infant, premature/                                                                                                                                                         |
|                                           | 60 | (((pre-term* or preterm* or premature) adj birth*) or premat*).ti,ab.                                                                                                                                             |
|                                           | 61 | 59 or 60                                                                                                                                                                                                          |
| Admission to neonatal intensive care unit | 62 | Intensive Care, Neonatal/ or Intensive Care Units, Neonatal/                                                                                                                                                      |
|                                           | 63 | (((neonatal or newborn*) adj1 (intensive or unit* or ICU*)) or ((neonatal or special) adj2 nursery) or NICU).ti,ab.                                                                                               |
|                                           | 64 | 62 or 63                                                                                                                                                                                                          |
| Neonatal respiratory distress syndrome    | 65 | Respiratory Distress Syndrome, Newborn/                                                                                                                                                                           |
|                                           | 66 | ((infan* or neonat* or newborn* or baby or babies) and (respiratory distress or dyspn?ea or cyanosis or RDS)).ti,ab.                                                                                              |
|                                           | 67 | 65 or 66                                                                                                                                                                                                          |
| Neonatal jaundice                         | 68 | exp Hyperbilirubinemia, Neonatal/                                                                                                                                                                                 |
|                                           | 69 | ((infan* or neonat* or newborn* or baby or babies) adj5 (hyperbilirubin* or jaundice)).ti,ab.                                                                                                                     |
|                                           | 70 | 68 or 69                                                                                                                                                                                                          |
| Neonatal hypocalcaemia                    | 71 | Hypocalcemia/ and (infan* or neonat* or newborn* or baby or babies).ti,ab.                                                                                                                                        |
|                                           | 72 | ((infan* or neonat* or newborn* or baby or babies) and (hypocalc?emi* or (low adj2 calcium))).ti,ab.                                                                                                              |
|                                           | 73 | 71 or 72                                                                                                                                                                                                          |
| Neonatal adiposity                        | 74 | Pediatric obesity/ and (infan* or neonat* or newborn* or baby or babies).ti,ab.                                                                                                                                   |
|                                           | 75 | (((infan* or neonat* or newborn* or baby or babies) adj5 (adipos* or skin-fold or skinfold or weight or body mass index or fat or abdominal circumference or obesity or anthropometr*)) or ponderal index).ti,ab. |
|                                           | 76 | 74 or 75                                                                                                                                                                                                          |
| Postpartum infection                      | 77 | Puerperal Infection/                                                                                                                                                                                              |
|                                           | 78 | ((postpartum* or post-partum* or puerper*) and (infect* or sepsi*)).ti,ab.                                                                                                                                        |
|                                           | 79 | 77 or 78                                                                                                                                                                                                          |
| Apgar score < seven at 5 minutes          | 80 | Apgar Score/                                                                                                                                                                                                      |
|                                           | 81 | apgar*.ti,ab.                                                                                                                                                                                                     |
|                                           | 82 | 80 or 81                                                                                                                                                                                                          |
| Neonatal polycythaemia                    | 83 | Polycythemia/ and (infan* or neonat* or newborn* or baby or babies).ti,ab.                                                                                                                                        |
|                                           | 84 | ((infan* or neonat* or newborn* or baby or babies) adj3 polycyth?emia).ti,ab.                                                                                                                                     |
|                                           | 85 | 83 or 84                                                                                                                                                                                                          |
| Instrumental delivery                     | 86 | exp Extraction, Obstetrical/ or exp Delivery Obstetric/ or exp Vacuum Extraction, Obstetrical/                                                                                                                    |

|                                                           |    |                                                                                                                                                          |
|-----------------------------------------------------------|----|----------------------------------------------------------------------------------------------------------------------------------------------------------|
|                                                           | 87 | ((obstetric* or instrument* or forcep* or vacuum*) adj2 (deliver* or extraction*)).ti,ab.                                                                |
|                                                           | 88 | 86 or 87                                                                                                                                                 |
| 'Pregnancy complications' as a general concept            | 89 | exp Pregnancy Outcome/ or exp Pregnancy Complications/                                                                                                   |
|                                                           | 90 | ((pregnan* or perinatal or obstetric* or labo?r or birth or neonatal or maternal) adj3 (outcome* or complication* or adverse)).ti,ab.                    |
|                                                           | 91 | 89 or 90                                                                                                                                                 |
| <b>Combination of all pregnancy complication concepts</b> | 92 | 16 or 19 or 22 or 25 or 28 or 31 or 34 or 37 or 40 or 43 or 46 or 49 or 52 or 55 or 58 or 61 or 64 or 67 or 70 or 73 or 76 or 79 or 82 or 85 or 88 or 91 |
| <b>Combination of concepts</b>                            | 93 | 8 and 13 and 92                                                                                                                                          |
| <b>Human filter</b>                                       | 94 | exp animals/ not humans/                                                                                                                                 |

Figure S1. Draft PRISMA Flow Diagram for the systematic review process.

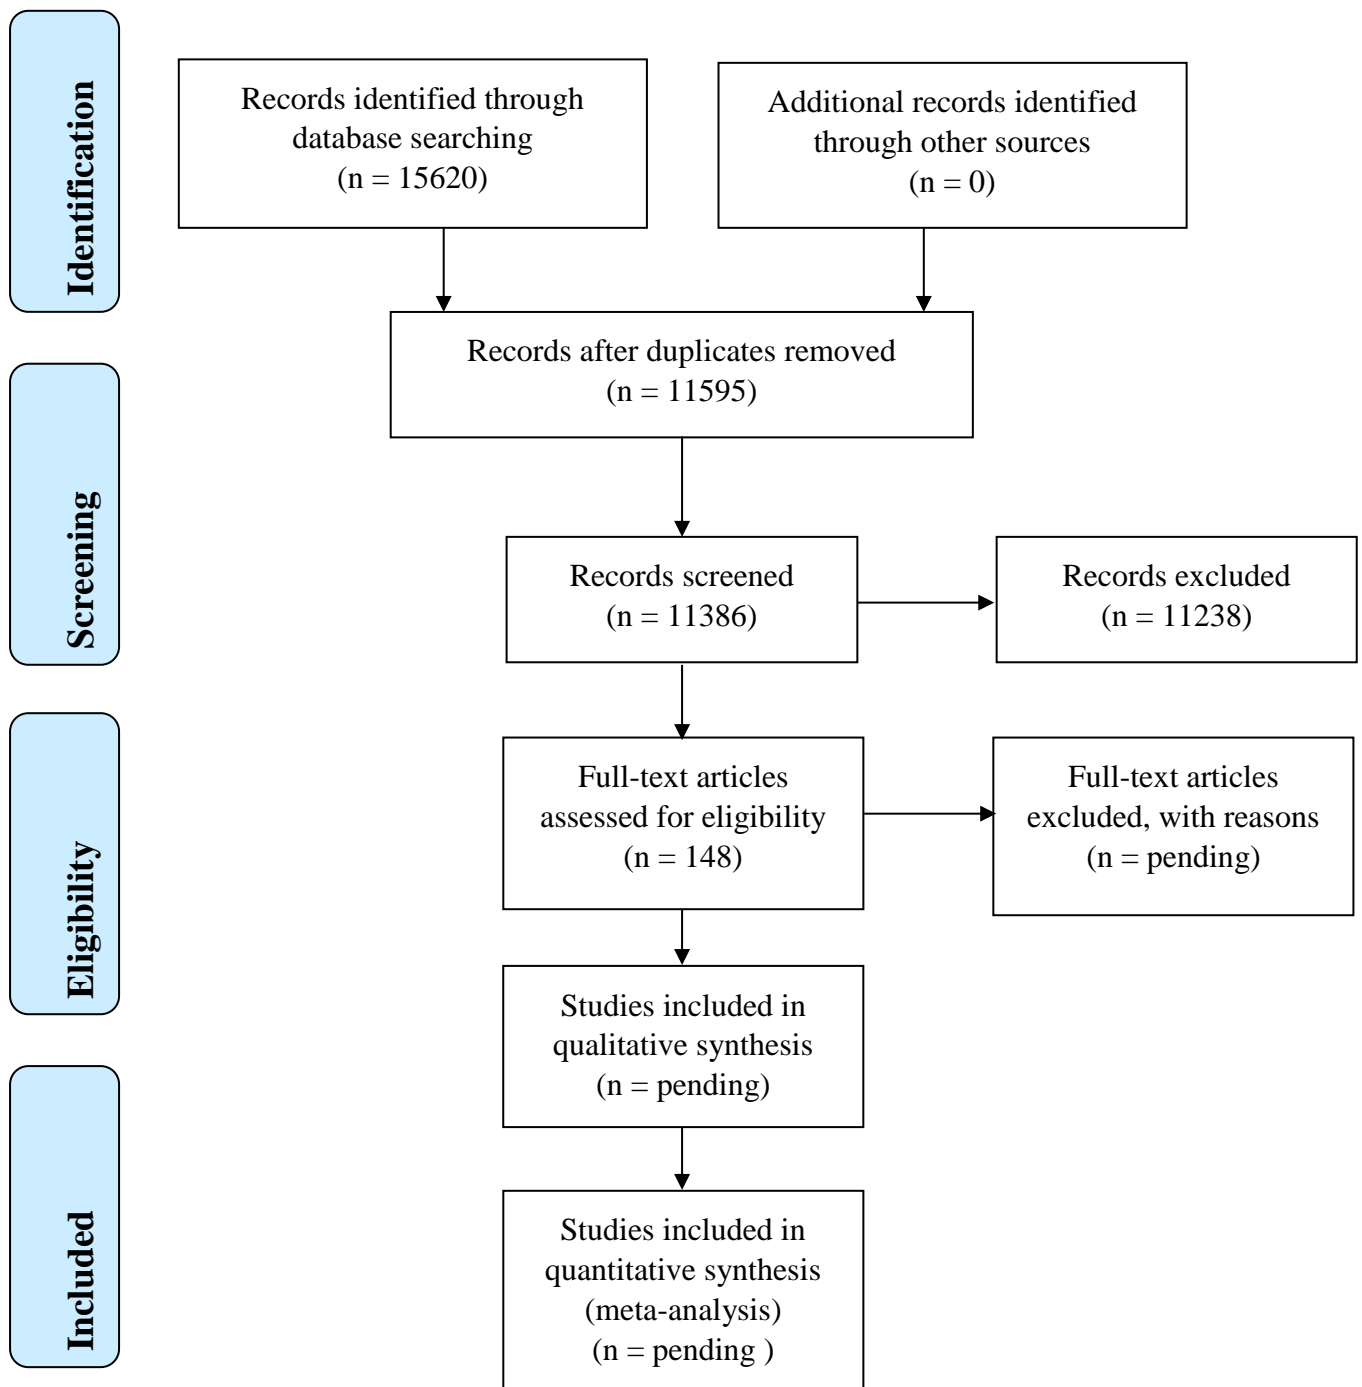

## References

1. Ingui BJ, Rogers MA. Searching for clinical prediction rules in MEDLINE. *J Am Med Inform Assoc.* 2001;8(4):391-7.
2. Geersing GJ, Bouwmeester W, Zuithoff P, Spijker R, Leeflang M, Moons KG. Search filters for finding prognostic and diagnostic prediction studies in Medline to enhance systematic reviews. *PLoS One.* 2012;7(2):e32844.
